# Supplementary material
Source: MDPI journal article supplement (https://www.mdpi.com/2072-4292/12/1/48)
Supplement: s1 [file s1]

## Supplementary Materials

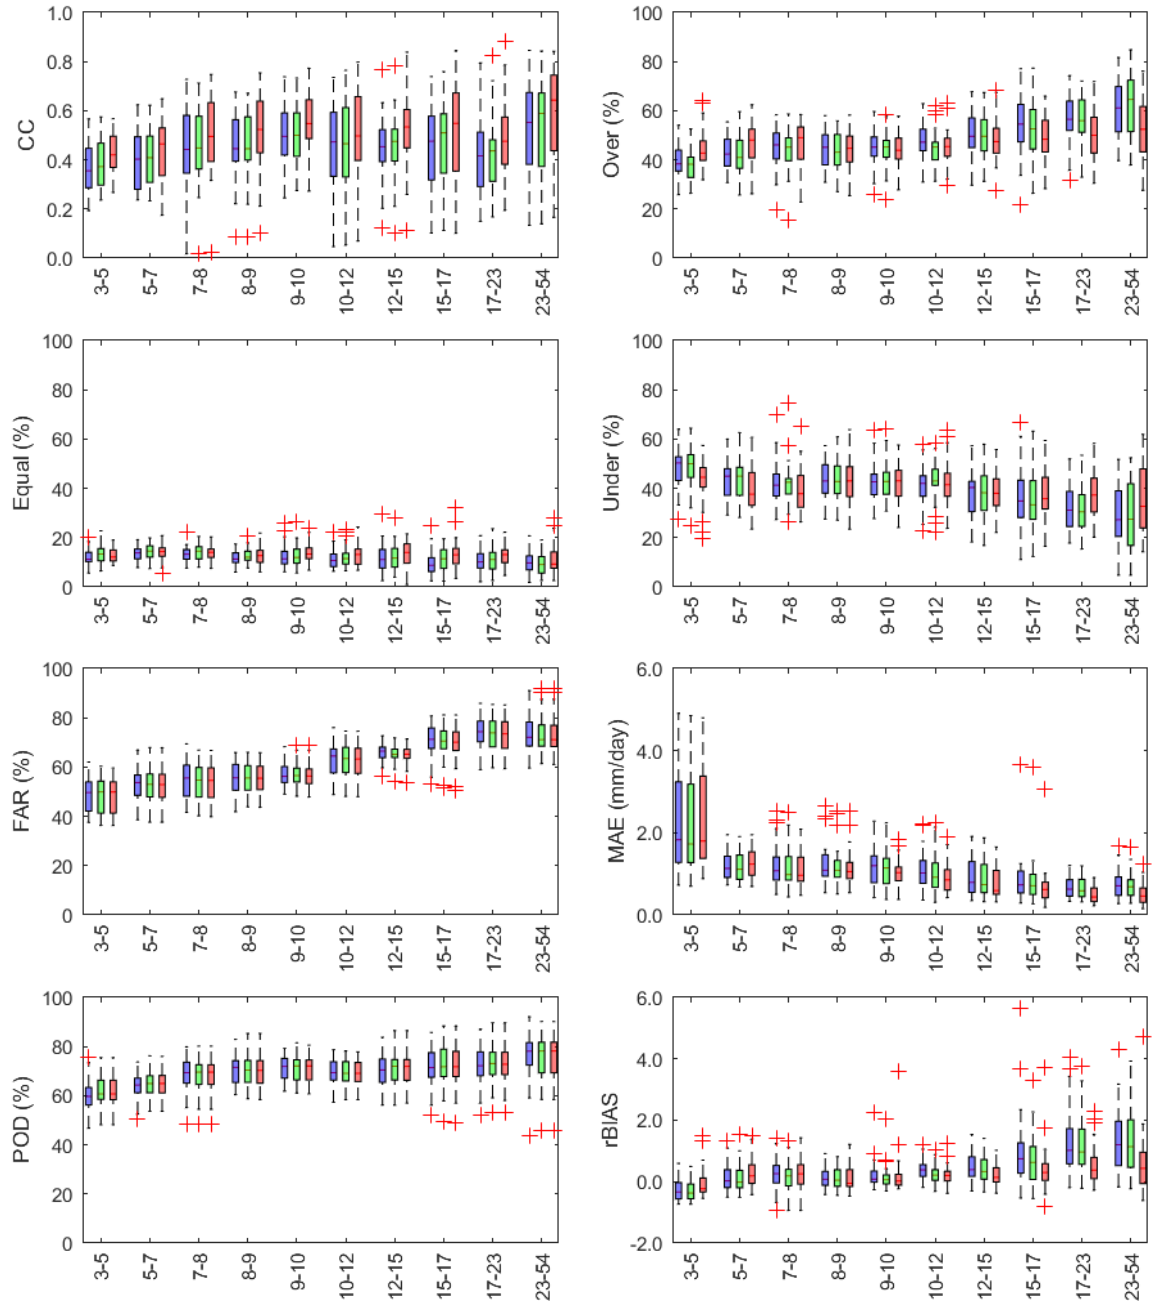

**Figure S1.** Box plots of the criteria indices for the ten average dry period (in days) bins in blue, green, and red color corresponding to the IMERG-Early, IMERG-Late, and IMERG-Final products, respectively. The horizontal dividing line and the upper and lower bounds of the boxes, are the 50th, 75th, and 25th percentiles, respectively. The red plus symbols denote outliers and whiskers (dashed black lines) extreme data not considered outliers.

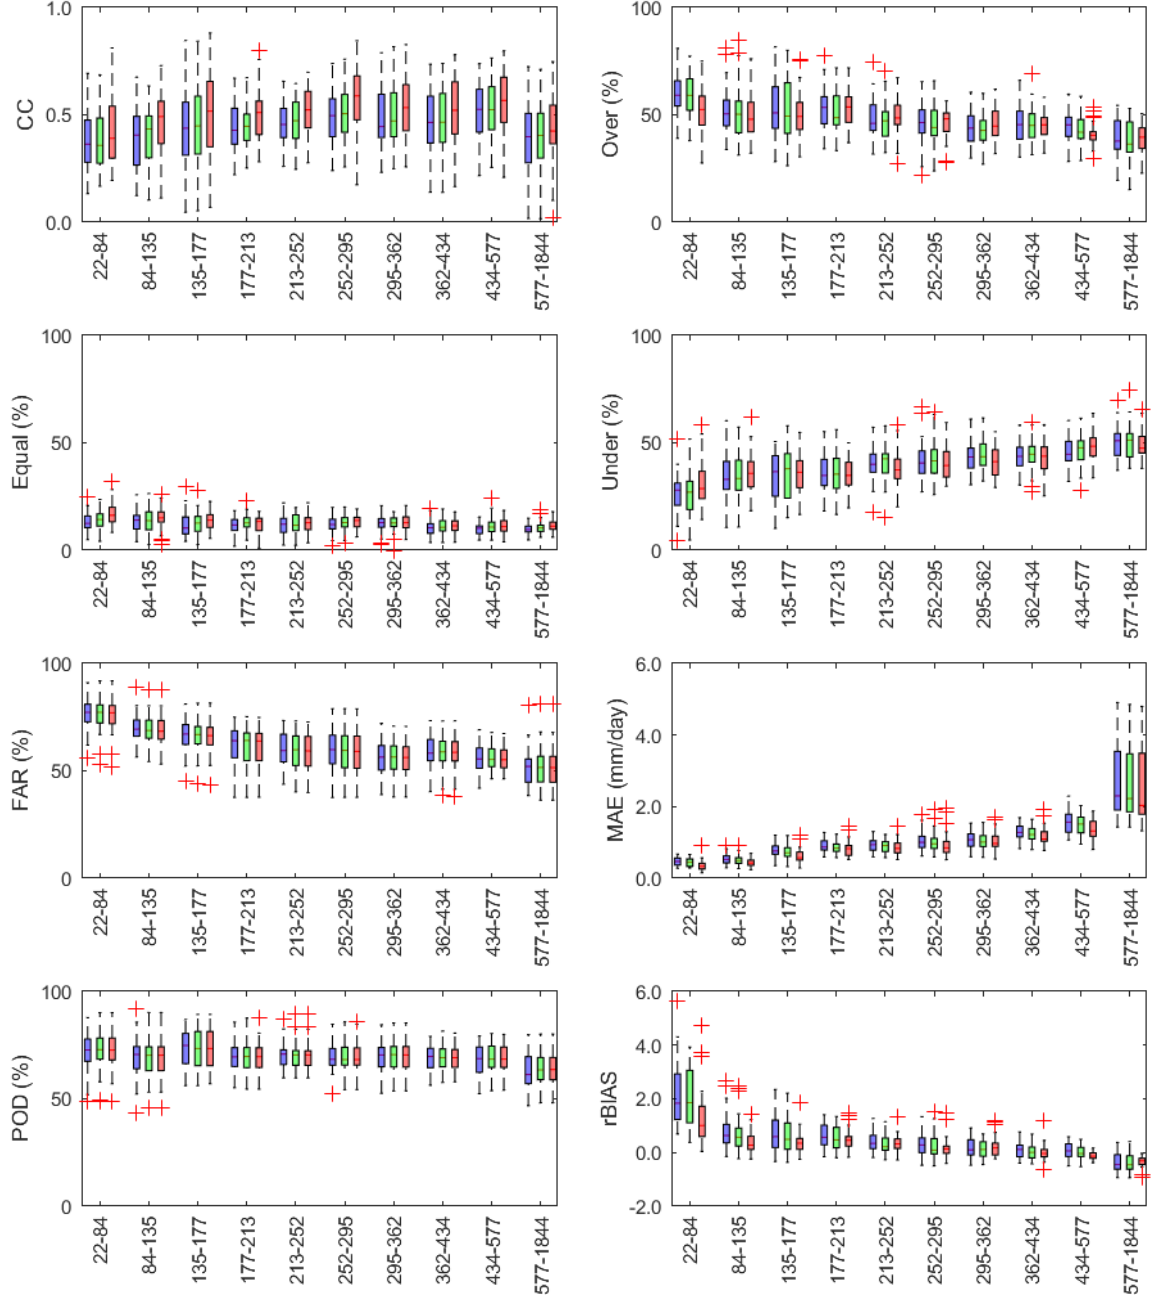

**Figure S2.** Box plots of the criteria indices for the ten average annual rainfall (mm year<sup>-1</sup>) bins in blue, green, and red color corresponding to the IMERG-Early, IMERG-Late, and IMERG-Final products, respectively. The horizontal dividing line and the upper and lower bounds of the boxes, are the 50th, 75th, and 25th percentiles, respectively. The red plus symbols denote outliers and whiskers (dashed black lines) extreme data not considered outliers.

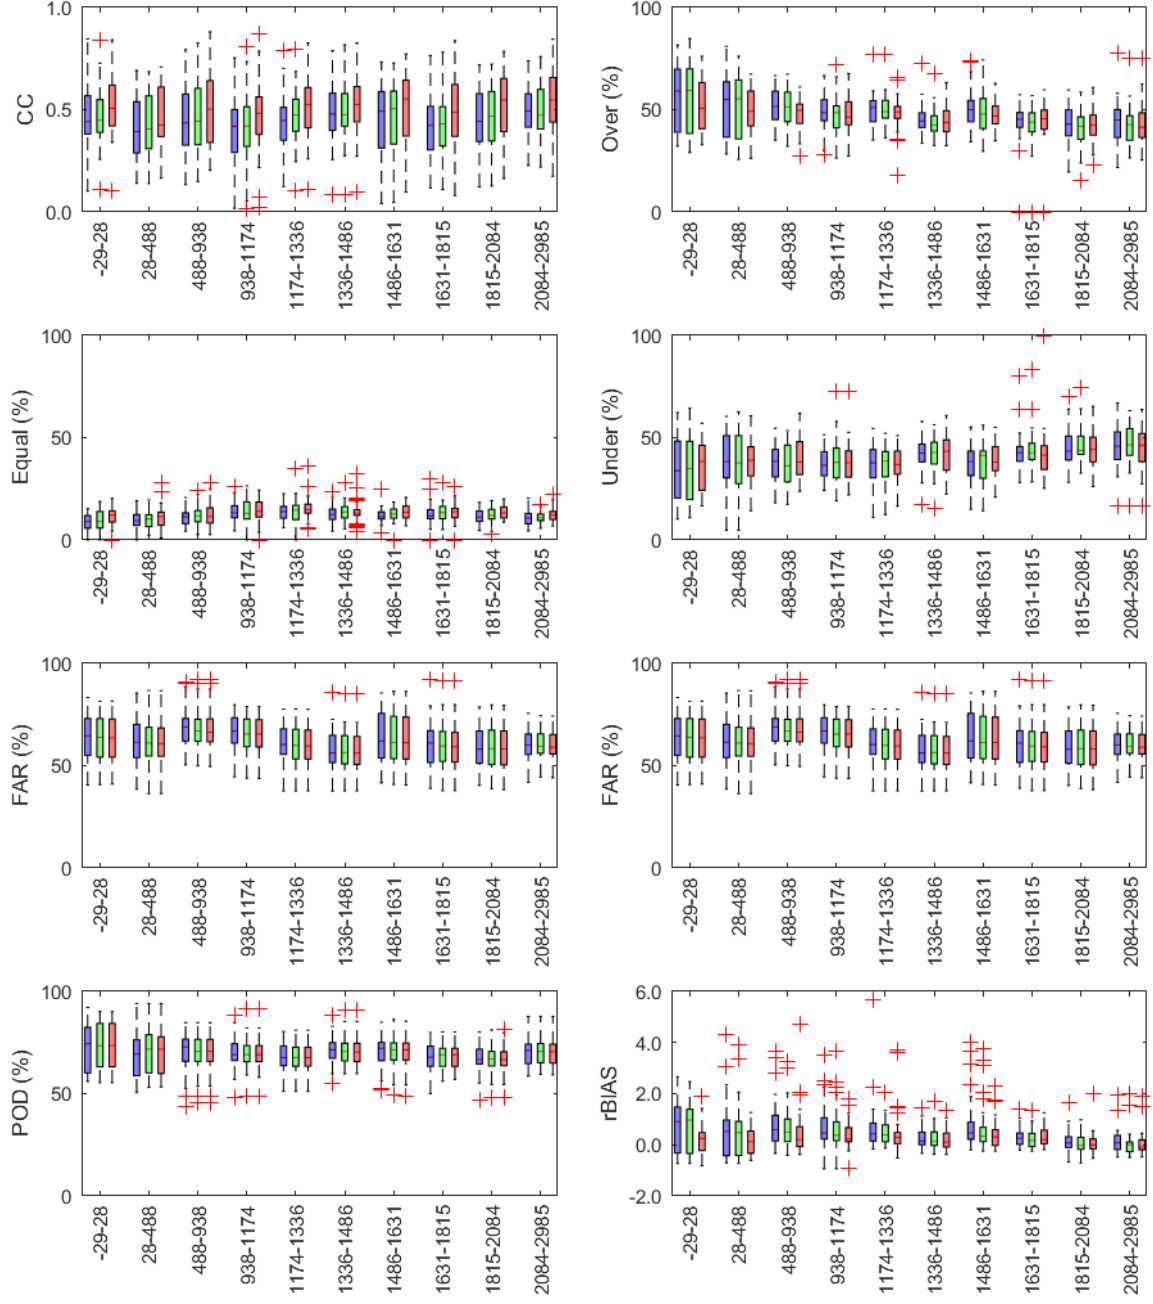

**Figure S3.** Box plots of the criteria indices for the ten elevation (meter) bins in blue, green, and red color corresponding to the IMERG-Early, IMERG-Late, and IMERG-Final products, respectively. The horizontal dividing line and the upper and lower bounds of the boxes, are the 50th, 75th, and 25th percentiles, respectively. The red plus symbols denote outliers and whiskers (dashed black lines) extreme data not considered outliers.

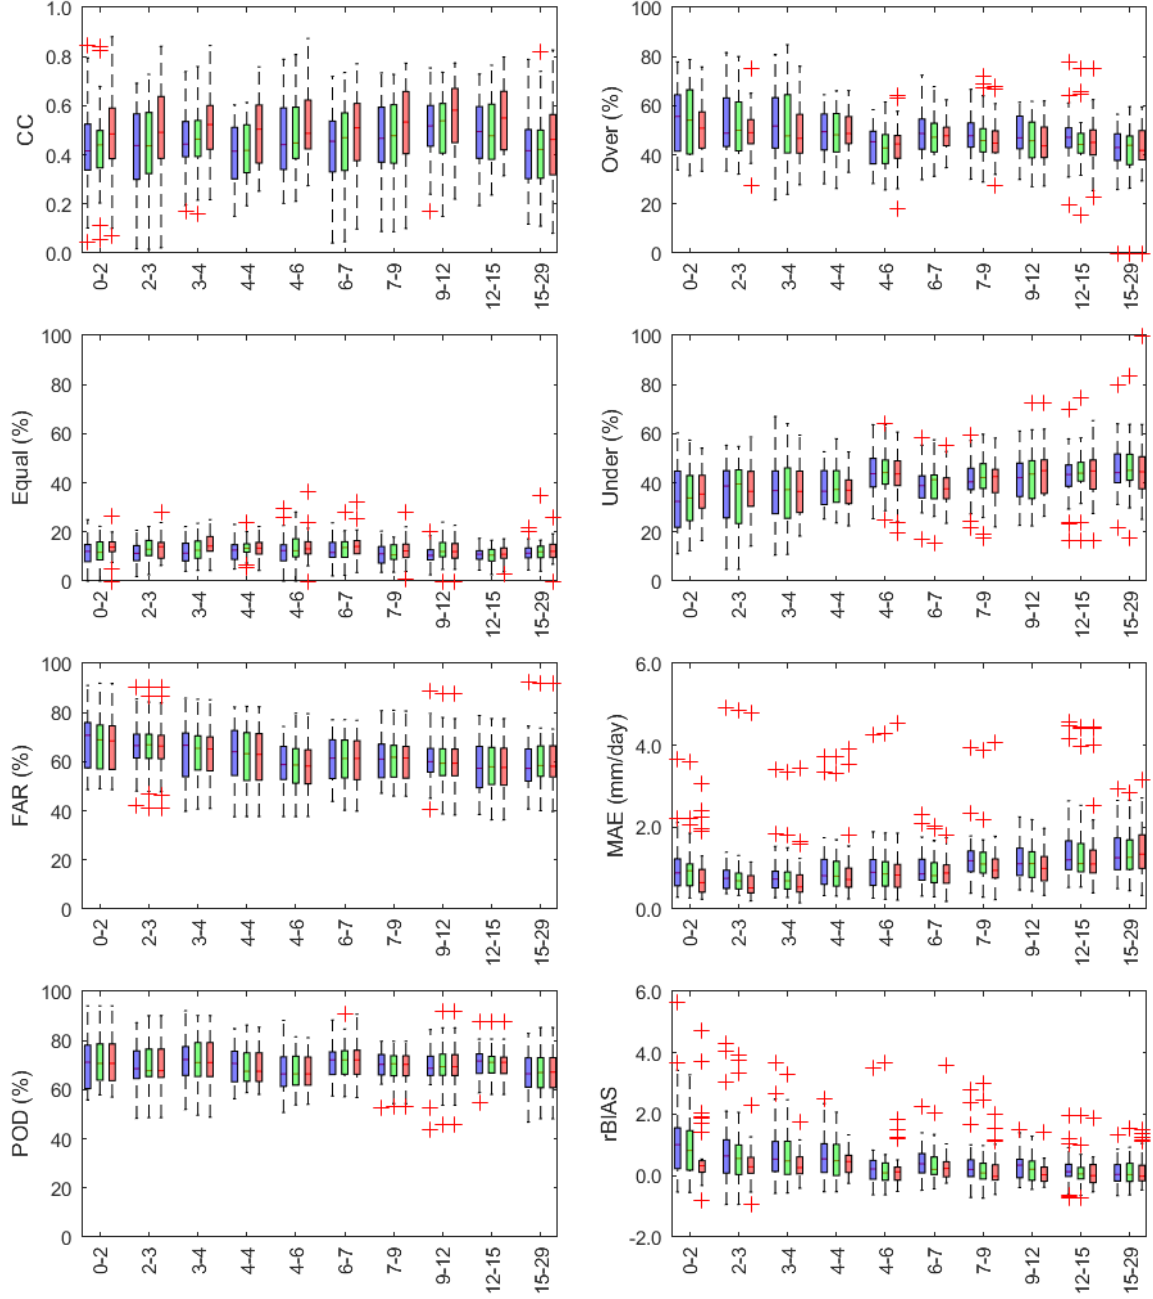

**Figure S4.** Box plots of the criteria indices for the ten slope bins in blue, green, and red color corresponding to the IMERG-Early, IMERG-Late, and IMERG-Final products, respectively. The horizontal dividing line and the upper and lower bounds of the boxes, are the 50th, 75th, and 25th percentiles, respectively. The red plus symbols denote outliers and whiskers (dashed black lines) extreme data not considered outliers.

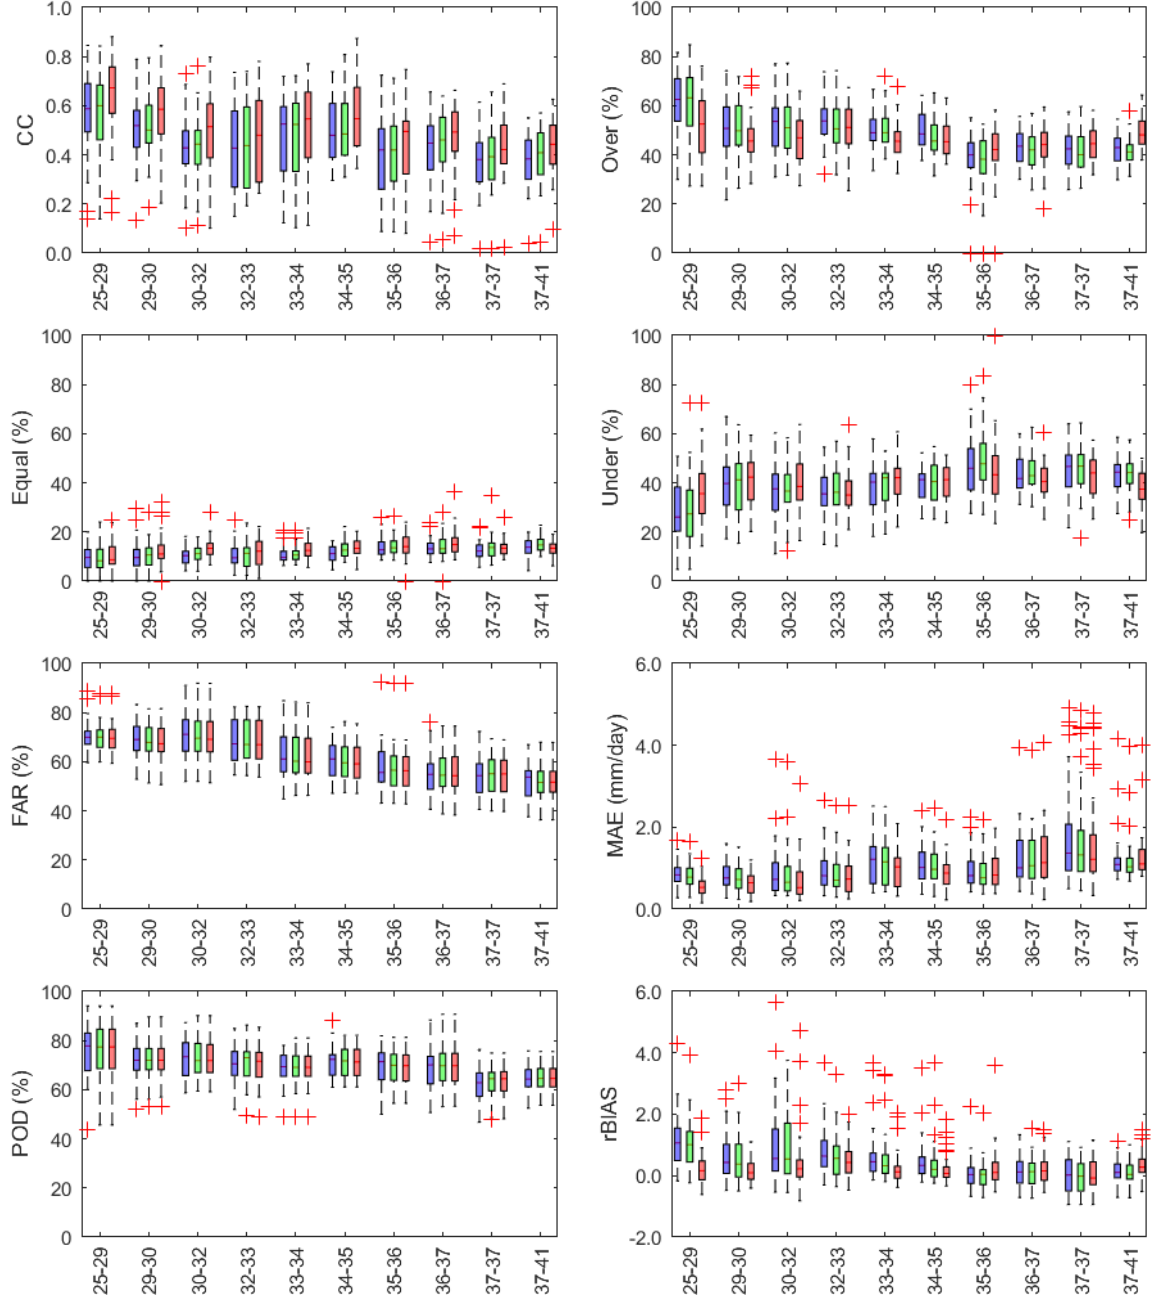

**Figure S5.** Box plots of the criteria indices for the ten latitude ( $^{\circ}$ N) bins in blue, green, and red color corresponding to the IMERG-Early, IMERG-Late, and IMERG-Final products, respectively. The horizontal dividing line and the upper and lower bounds of the boxes, are the 50th, 75th, and 25th percentiles, respectively. The red plus symbols denote outliers and whiskers (dashed black lines) extreme data not considered outliers.

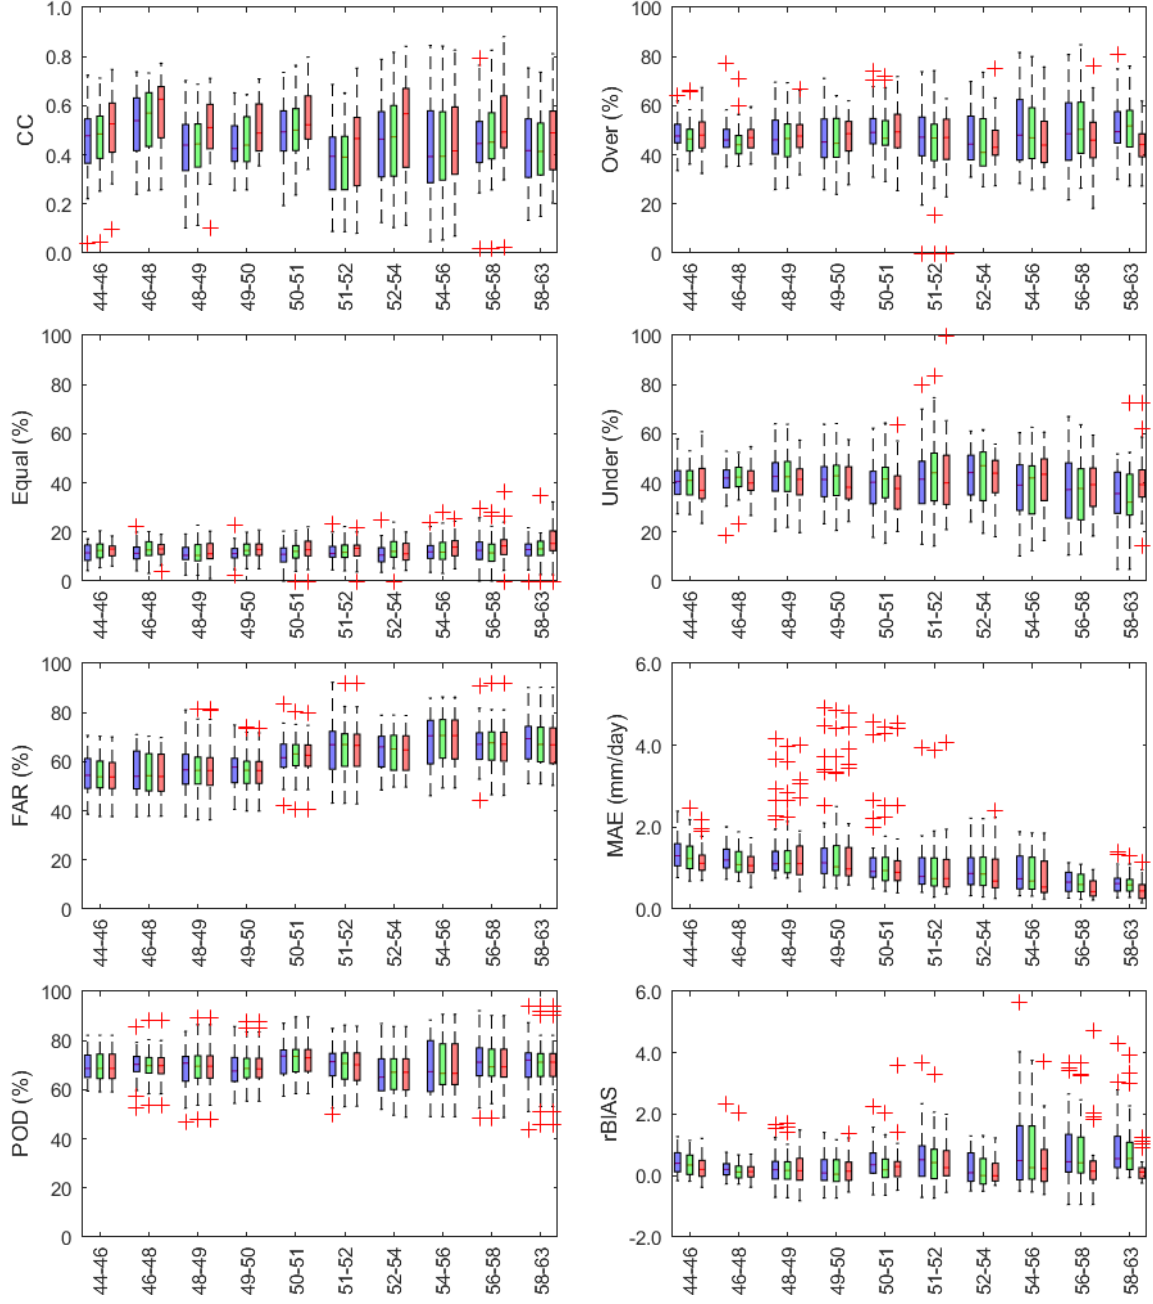

**Figure S6.** Box plots of criteria indices for the ten longitude (°E) bins in blue, green, and red color corresponding to the IMERG-Early, IMERG-Late, and IMERG-Final product, respectively. The horizontal dividing line and the upper and lower bounds of the boxes, are the 50th, 75th, and 25th percentiles, respectively. The red plus symbols denote outliers and whiskers (dashed black lines) extreme data not considered outliers.

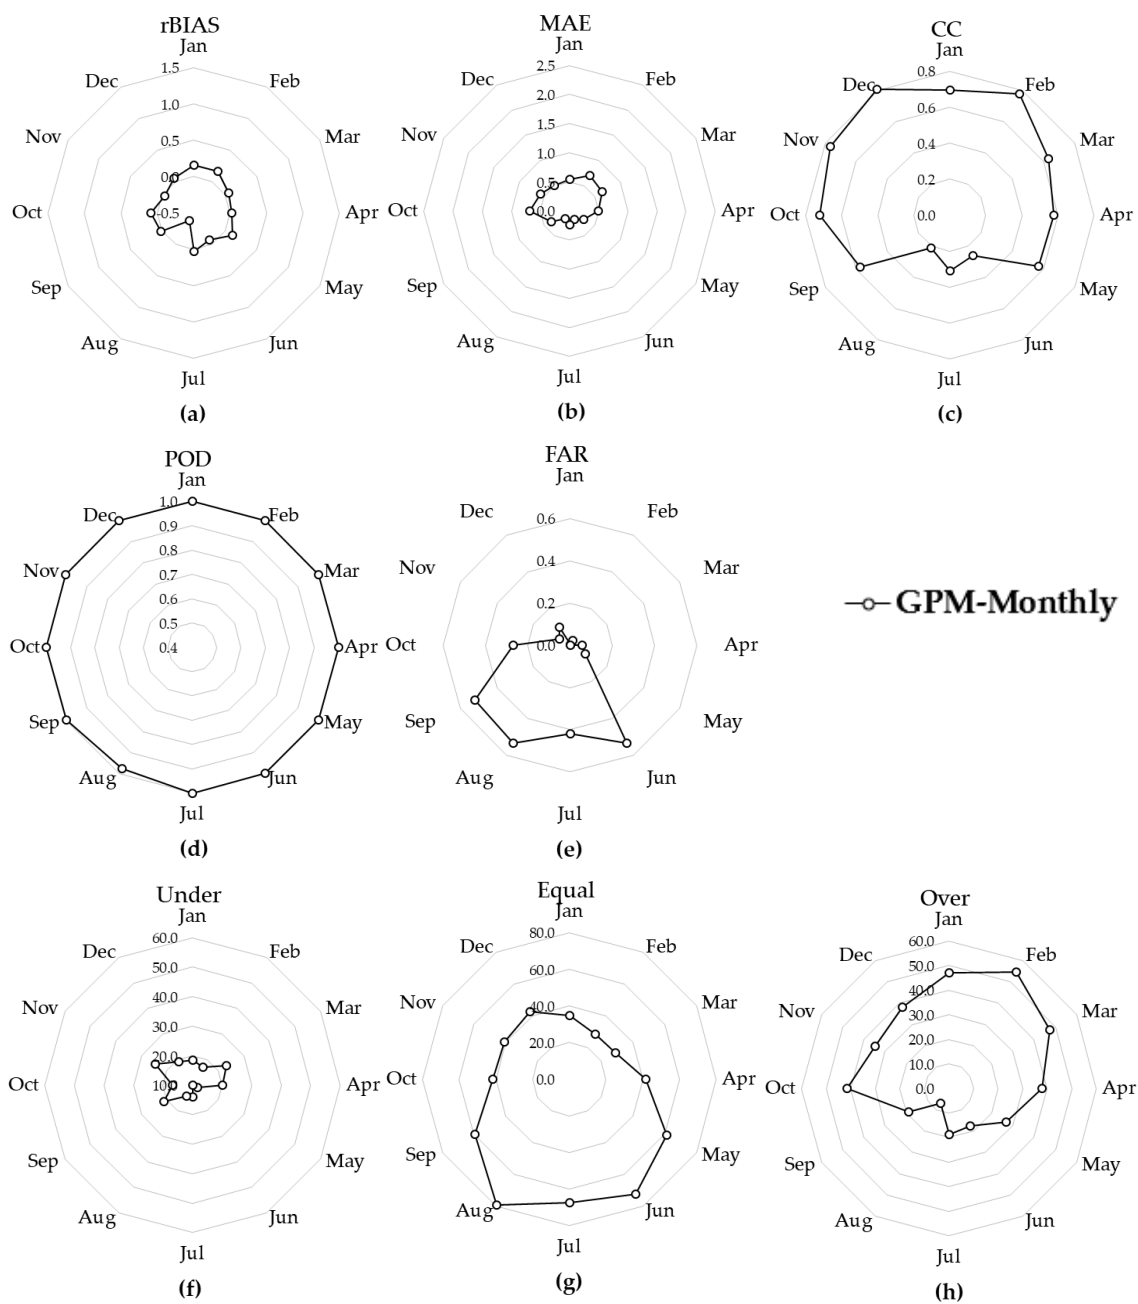

**Figure S7.** Radar charts of criteria indices for IMERG-Monthly.

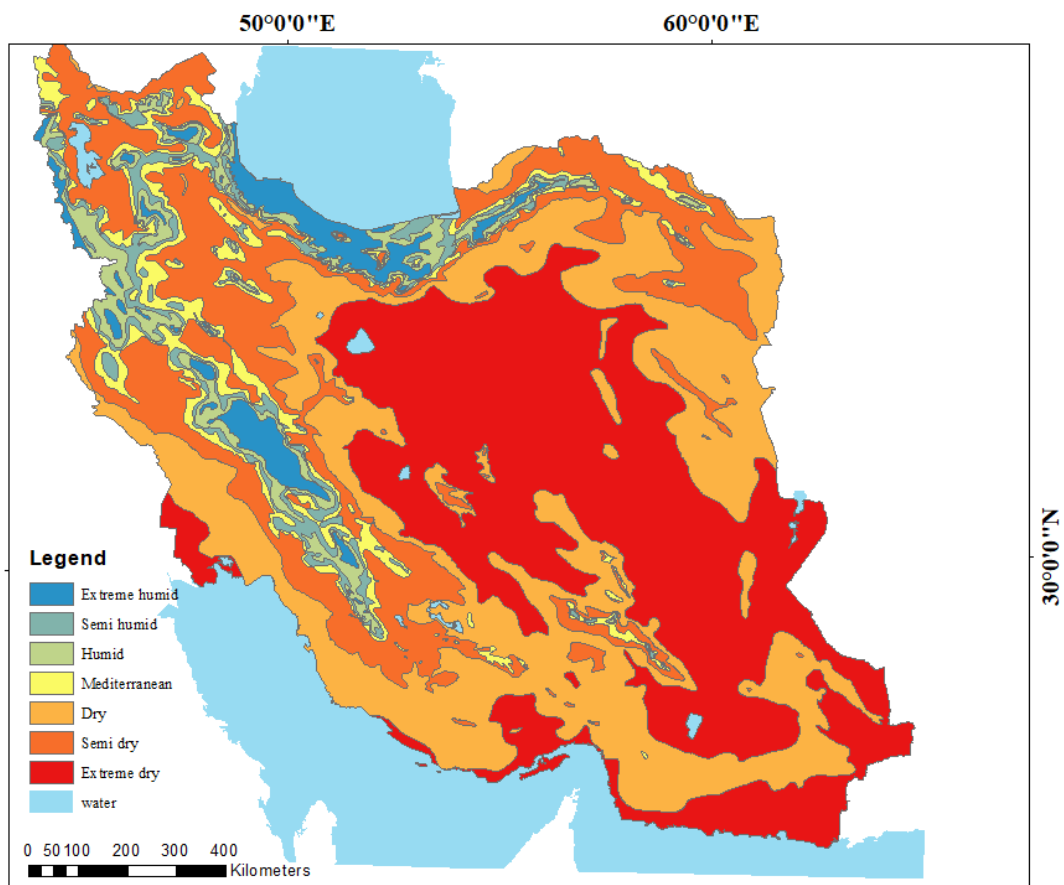

**Figure S8.** Iran's climate zones.
